# Supplementary material for: Distinct Neural Correlates of Linguistic and Non-Linguistic Demand
Source: PubMed Central journal article supplement (PMC8475781; doi:10.1162/nol_a_00031), 2021-03-29
Supplement: NIHMS1682938-supplement-Supplementary_Material.pdf [file NIHMS1682938-supplement-Supplementary_Material.pdf]

## Supplementary Tables

**Supplementary Table 1.** Modulation by linguistic demand:  $p$  values for pairwise comparisons between multiple demand regions

|        | L IFJ  | R IFJ | L aIns | R aIns | L SMA | R SMA  | L PMd   | R PMd | L IPS | R IPS   | L OT |
|--------|--------|-------|--------|--------|-------|--------|---------|-------|-------|---------|------|
| L IFJ  |        |       |        |        |       |        |         |       |       |         |      |
| R IFJ  | .85    |       |        |        |       |        |         |       |       |         |      |
| L aIns | .38    | .98   |        |        |       |        |         |       |       |         |      |
| R aIns | .80    | 1     | .88    |        |       |        |         |       |       |         |      |
| L SMA  | 1      | 1     | .65    | .95    |       |        |         |       |       |         |      |
| R SMA  | 1      | .85   | .18    | .21    | 1     |        |         |       |       |         |      |
| L PMd  | .016 * | .14   | .79    | .080   | .10   | .013 * |         |       |       |         |      |
| R PMd  | .78    | .99   | 1      | 1      | .98   | .72    | .88     |       |       |         |      |
| L IPS  | 1      | .99   | .68    | .93    | 1     | 1      | .044 *  | .53   |       |         |      |
| R IPS  | .77    | 1     | 1      | 1      | .94   | .69    | .93     | 1     | .19   |         |      |
| L OT   | .99    | .24   | .059   | .11    | .43   | .96    | .0002 * | .11   | .44   | .0051 * |      |
| R OT   | 1      | .94   | .5     | .76    | 1     | 1      | .032 *  | .54   | 1     | .11     | .86  |

All  $p$  values are corrected for multiple comparisons. \* =  $p < .05$ . See Figure 7 caption for abbreviations.

**Supplementary Table 2.** Modulation by linguistic demand relative to non-linguistic demand: *p* values for pairwise comparisons between multiple demand regions

|        | L IFJ   | R IFJ   | L aIns   | R aIns  | L SMA    | R SMA   | L PMd   | R PMd   | L IPS   | R IPS   | L OT |
|--------|---------|---------|----------|---------|----------|---------|---------|---------|---------|---------|------|
| L IFJ  |         |         |          |         |          |         |         |         |         |         |      |
| R IFJ  | .57     |         |          |         |          |         |         |         |         |         |      |
| L aIns | .97     | .0063 * |          |         |          |         |         |         |         |         |      |
| R aIns | 1       | .88     | .058     |         |          |         |         |         |         |         |      |
| L SMA  | 1       | .019 *  | 1        | .082    |          |         |         |         |         |         |      |
| R SMA  | 1       | .76     | .46      | 1       | .36      |         |         |         |         |         |      |
| L PMd  | .98     | 1       | .01 *    | 1       | .067     | .99     |         |         |         |         |      |
| R PMd  | .89     | 1       | .0035 *  | .98     | .0021 *  | .80     | 1       |         |         |         |      |
| L IPS  | .0006 * | .0004 * | <.0001 * | .0004 * | <.0001 * | .0026 * | .0002 * | .0076 * |         |         |      |
| R IPS  | .0001 * | .014 *  | .0001 *  | .018 *  | <.0001 * | .0046 * | .0011 * | .019 *  | .99     |         |      |
| L OT   | .97     | 1       | .024 *   | 1       | .026 *   | .99     | 1       | 1       | .0001 * | .0003 * |      |
| R OT   | 1       | .98     | .60      | 1       | .61      | 1       | 1       | .87     | .0021 * | .0044 * | .95  |

All *p* values are corrected for multiple comparisons. \* = *p* < .05. See Figure 7 caption for abbreviations.

**Supplementary Table 3.** Modulation by linguistic demand: *p* values for pairwise comparisons between language regions

|          | L IFGpop | L IFGpt | L SMA | L Fus  | L pSTS | L aSTS | L Hipp | R IFGpt | R pSTS |
|----------|----------|---------|-------|--------|--------|--------|--------|---------|--------|
| L IFGpop |          |         |       |        |        |        |        |         |        |
| L IFGpt  |          | 1       |       |        |        |        |        |         |        |
| L SMA    | .011 *   | .0005 * |       |        |        |        |        |         |        |
| L Fus    | .52      | .34     | .94   |        |        |        |        |         |        |
| L pSTS   | .014 *   | .0072 * | 1     | .99    |        |        |        |         |        |
| L aSTS   | .034 *   | .0065 * | 1     | .71    | 1      |        |        |         |        |
| L Hipp   | .010 *   | .0087 * | .97   | .019 * | .99    | .99    |        |         |        |
| R IFGpt  | .14      | .034 *  | 1     | .87    | 1      | 1      | .88    |         |        |
| R pSTS   | .010 *   | .0023 * | .91   | .12    | .97    | .98    | 1      | .63     |        |
| R aSTS   | .019 *   | .0062 * | .94   | .13    | .99    | .99    | 1      | .71     | 1      |

All *p* values are corrected for multiple comparisons. \* =  $p < .05$ . See Figure 7 caption for abbreviations.

**Supplementary Table 4.** Modulation by linguistic demand relative to perceptual demand:  $p$  values for pairwise comparisons between language regions

|          | L IFGpop | L IFGpt | L SMA | L Fus | L pSTS | L aSTS | L Hipp | R IFGpt | R pSTS |
|----------|----------|---------|-------|-------|--------|--------|--------|---------|--------|
| L IFGpop |          |         |       |       |        |        |        |         |        |
| L IFGpt  | .013 *   |         |       |       |        |        |        |         |        |
| L SMA    | .82      | .0001 * |       |       |        |        |        |         |        |
| L Fus    | .61      | .0001 * | 1     |       |        |        |        |         |        |
| L pSTS   | 1        | .025 *  | .26   | .11   |        |        |        |         |        |
| L aSTS   | 1        | .40     | .67   | .47   | 1      |        |        |         |        |
| L Hipp   | .97      | .0079 * | 1     | 1     | .63    | .89    |        |         |        |
| R IFGpt  | .78      | .0001 * | 1     | 1     | .14    | .54    | 1      |         |        |
| R pSTS   | .91      | .0008 * | 1     | 1     | .33    | .85    | 1      | 1       |        |
| R aSTS   | .99      | .0020 * | 1     | .79   | .74    | .89    | .99    | .92     | 1      |

All  $p$  values are corrected for multiple comparisons. \* =  $p < .05$ . See Figure 7 caption for abbreviations.
